# Supplementary material
Source: Springer Nature journal article supplement (https://www.springermedizin.de/resource/supplementary/12884_2014_1067_MOESM3_ESM.pdf/9458832)

4F2hc

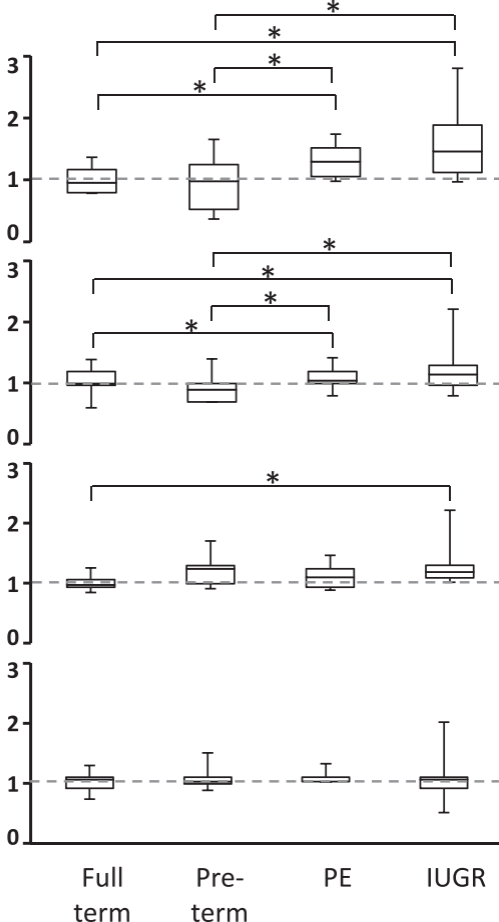

LAT1

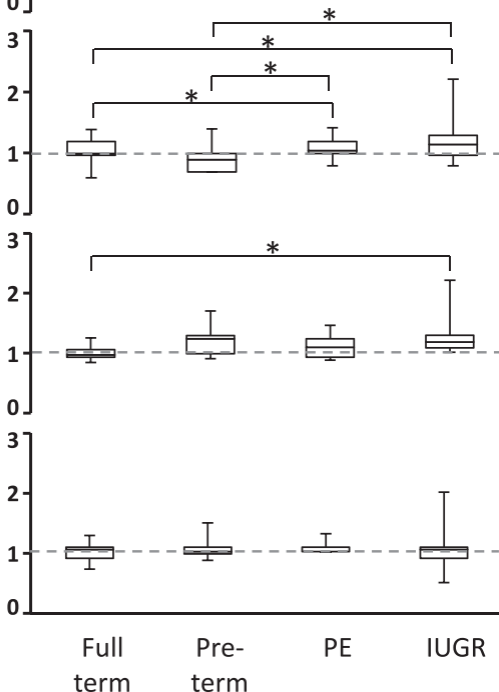

ASCT2

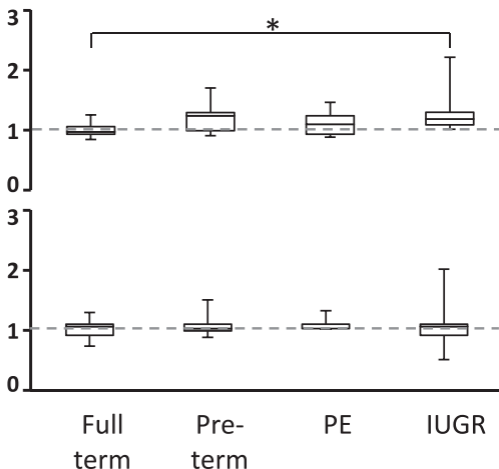

CK7

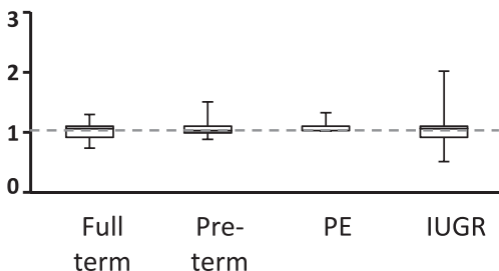

Supplement: MOESM3 [file 9458832]
